# Supplementary material
Source: Copernicus journal article supplement (doi:10.5194/bg-23-2939-2026)
Supplement: Supplementary file 1 [file bg-23-2939-2026-supplement.pdf]

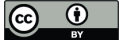

*Supplement of*

## **Dissolved oxygen budget in the Levantine Sea: a coupled physical-biogeochemical modelling approach**

**Joelle Habib et al.**

*Correspondence to:* Joelle Habib ([joellehabib22@hotmail.com](mailto:joellehabib22@hotmail.com))

The copyright of individual parts of the supplement might differ from the article licence.

## Supplement Material

### S1: Equation of dissolved oxygen budget

The variation of the dissolved oxygen inventory in the upper layer between times  $t_1$  and  $t_2$  ( $\Delta DOx I_{upper}$ ), in mol  $O_2 m^{-2}$ , is equal to the sum of all DOx fluxes within the Levantine Basin between  $t_1$  and  $t_2$ :

$$\Delta DOx I_{upper} = DOx I_{upper, t1} - DOx I_{upper, t2} = \int_{t_1}^{t_2} \left( F_{DOx,air-sea} + F_{DOx,lat} + F_{DOx,vert} + F_{DOx,bgc} \right) dt \quad (S1)$$

where  $F_{DOx,lat}$ , and  $F_{DOx,vert}$  are the lateral and vertical fluxes at the boundaries of the Levantine Basin area,  $F_{DOx,air-sea}$  is the air-sea flux, and  $F_{DOx,bgc}$  is the biogeochemical flux.

$DOx I_{upper,t}$  was computed from:

$$DOx I_{upper,t} = \int \int_{(x,y) \in RG/z \in upper\ layer} DOx(x, y, z, t) dx dy dz \quad (S2)$$

where  $(x,y,z)$  belongs to the upper layer (150 m to the surface) of the Levantine Basin.

The lateral flux was computed from:

$$F_{DOx,lat} = \int \int_A DOx(x, y, z, t) v_t(x, y, z, t) dA \quad (S3)$$

where  $v_t$  is the current velocity normal to the limits of the Levantine Basin (in  $m^3 s^{-1}$ ), and  $A$  is the area of the section from the base of the upper layer (150 m) to the surface. We distinguished the limit with the Ionian Sea and the one with the Aegean Sea (indicated in Fig. 1).

$F_{DOx,bgc}$  was computed from:

$$F_{DOx,bgc} = \int \int_{(x,y) \in RG/z \in upper\ layer} BGCflux(x, y, z, t) dx dy dz \quad (S4)$$

where  $BGCflux$  is the biogeochemical flux, i.e.  $\sum_{C/DOx} GPP - \sum_{C/DOx} CR - \sum_{N/DOx} Nitrif$ , where GPP is the gross primary production, CR, the community respiration, and Nitrif the nitrification.

Finally, the vertical transport flux,  $F_{DOx,vert}$ , was derived from all other terms of Eq. (S1).

The computation of DOx balance in the intermediate layer is computed similarly, with the inventory variation as the sum of the lateral and vertical fluxes at the boundaries, and the biogeochemical flux.

## Tables

**Table S1: Comparison between averaged modeled and observation rates over the same period and along the same region. a: Lagaria et al., (2011), b: Christaki et al. (2011), c: Regaudie-de-Gioux et al. (2009), (d) Moutin and Raimbault (1996).**

| Process    | Campaign  | Region                                                | Period               | Layer            | Observation                                                            | Model                                                      | Reference |
|------------|-----------|-------------------------------------------------------|----------------------|------------------|------------------------------------------------------------------------|------------------------------------------------------------|-----------|
| <b>GPP</b> | BOUM      | Core of an anticyclonic eddy in the eastern Levantine | mid-June to mid-July | Near the surface | $0.12 \pm 0.90$ mmol O <sub>2</sub> m <sup>-3</sup> day <sup>-1</sup>  | 1.36 mmol O <sub>2</sub> m <sup>-3</sup> day <sup>-1</sup> | a         |
|            |           |                                                       |                      | Integrated 145 m | 28-75 mmol O <sub>2</sub> m <sup>-2</sup> day <sup>-1</sup>            | 68 mmol O <sub>2</sub> m <sup>-2</sup> day <sup>-1</sup>   | b         |
|            | THRESHOLD | Levantine Basin                                       | May                  | 5-110 m          | 0.16-2.93 mmol O <sub>2</sub> m <sup>-3</sup> day <sup>-1</sup>        | 1-8 mmol O <sub>2</sub> m <sup>-3</sup> day <sup>-1</sup>  | c         |
|            | MINOS     | Levantine Basin                                       | May to June          | Near the surface | $0.59 \pm 0.16$ mmol O <sub>2</sub> m <sup>-3</sup> day <sup>-1</sup>  | 1.08 mmol O <sub>2</sub> m <sup>-3</sup> day <sup>-1</sup> | d         |
|            |           |                                                       | May to June          | Integrated 100m  | $37.9 \pm 4.8$ mmol O <sub>2</sub> m <sup>-2</sup> day <sup>-1</sup>   | 37 mmol O <sub>2</sub> m <sup>-2</sup> day <sup>-1</sup>   | d         |
| <b>CR</b>  | BOUM      | Core of an anticyclonic eddy in the eastern Levantine | mid-June to mid-July | Near the surface | $0.38 \pm 0.92$ mmol O <sub>2</sub> m <sup>-3</sup> day <sup>-1</sup>  | 1.28 mmol O <sub>2</sub> m <sup>-3</sup> day <sup>-1</sup> | a         |
|            |           |                                                       |                      | Integrated 145 m | 39-58 mmol O <sub>2</sub> m <sup>-2</sup> day <sup>-1</sup>            | 68 mmol O <sub>2</sub> m <sup>-2</sup> day <sup>-1</sup>   | b         |
|            | THRESHOLD | Levantine Basin                                       | May                  | 5-110 m          | 0.1-8.2 mmol O <sub>2</sub> m <sup>-3</sup> day <sup>-1</sup>          | 1-7 mmol O <sub>2</sub> m <sup>-3</sup> day <sup>-1</sup>  | c         |
| <b>NCP</b> | BOUM      | Core of an anticyclonic eddy in the eastern Levantine | mid-June to mid-July | Near the surface | $-0.26 \pm 0.22$ mmol O <sub>2</sub> m <sup>-3</sup> day <sup>-1</sup> | 0.09 mmol O <sub>2</sub> m <sup>-3</sup> day <sup>-1</sup> | a         |
|            |           |                                                       |                      | Integrated 145 m | $4 \pm 15$ mmol O <sub>2</sub> m <sup>-2</sup> day <sup>-1</sup>       | 0.9 mmol O <sub>2</sub> m <sup>-2</sup> day <sup>-1</sup>  | b         |
|            | THRESHOLD | Levantine Basin                                       | May                  | 5-110 m          | -6.4-8.2 mmol O <sub>2</sub> m <sup>-3</sup> day <sup>-1</sup>         | 0-2 mmol O <sub>2</sub> m <sup>-3</sup> day <sup>-1</sup>  | c         |

**Table S2: Metrics computed for MLD and heat flux for the Levantine basin for 2013-2020 winter (December-January-February). Blue columns represent the cold winter years.**

|                       | Units             | 2013-14 | 2014-15 | 2015-16 | 2016-17 | 2017-18 | 2018-19 | 2019-20 | 2020-21 | Mean (SD) |
|-----------------------|-------------------|---------|---------|---------|---------|---------|---------|---------|---------|-----------|
| Mean winter heat flux | W m <sup>-2</sup> | -121    | -169    | -137    | -177    | -124    | -182    | -168    | -132    | -152 (25) |
| Maximum MLD           | m                 | 95      | 123     | 107     | 121     | 107     | 112     | 105     | 92      | 108 (11)  |
| Date of maximum MLD   | -                 | 4 Feb   | 20 Feb  | 25 Jan  | 28 Jan  | 26 Jan  | 16 Jan  | 9 Feb   | 18 Feb  | -         |
| Mean MLD              | m                 | 70      | 76      | 67      | 83      | 71      | 83      | 69      | 59      | 72 (8)    |
| Mean Wind stress      | N m <sup>-2</sup> | 0.010   | 0.024   | 0.018   | 0.016   | 0.016   | 0.03    | 0.022   | 0.014   | 0.019     |

**Table S3: Annual air-sea oxygen flux, biogeochemical oxygen flux, and vertical oxygen flux at 150 and 400 m for the different years and averaged over the 7 years, estimated from the model in the Levantine basin. Positive values correspond to an input for the study area. The annual budget is calculated from December. The numbers in bold represent the cold winter years.**

|                             |                        | Units               | 2013-14 | <b>2014-15</b> | 2015-16 | <b>2016-17</b> | 2017-18 | <b>2018-19</b> | 2019-20 | Mean         |
|-----------------------------|------------------------|---------------------|---------|----------------|---------|----------------|---------|----------------|---------|--------------|
| Surface layer<br>(0 -150 m) | Internal variation     | Mol m <sup>-2</sup> | -0.23   | <b>0.31</b>    | -0.22   | <b>0.06</b>    | -0.22   | <b>0.36</b>    | -0.32   | -0.03 (0.28) |
|                             | Air-sea flux           | Mol m <sup>-2</sup> | 0.7     | <b>2.11</b>    | 0.96    | <b>2.11</b>    | 0.89    | <b>2.15</b>    | 1.26    | 1.45 (0.6)   |
|                             | BGC                    | Mol m <sup>-2</sup> | -0.17   | <b>0.34</b>    | 0.11    | <b>0.4</b>     | -0.06   | <b>0.46</b>    | 0.08    | 0.2 (0.2)    |
|                             | NCP                    | Mol m <sup>-2</sup> | 0.82    | <b>1.39</b>    | 1.15    | <b>1.5</b>     | 1.06    | <b>1.6</b>     | 1.2     | 1.23 (2.95)  |
|                             | Physical transfer      | Mol m <sup>-2</sup> | -0.76   | <b>-2.15</b>   | -1.29   | <b>-2.46</b>   | -1.05   | <b>-2.25</b>   | -1.67   | -1.66 (0.65) |
|                             | Downward flux at 150 m | Mol m <sup>-2</sup> | -3.89   | <b>-6.18</b>   | -3.91   | <b>-3.94</b>   | -2.91   | <b>-4.98</b>   | -3.46   | -4.2 (1.1)   |
|                             | Lat Ionian flux        | Mol m <sup>-2</sup> | 9.13    | <b>14.0</b>    | 9.92    | <b>11.78</b>   | 11.2    | <b>14.38</b>   | 10.07   | 11.5 (2)     |
|                             | Lat Aegean flux        | Mol m <sup>-2</sup> | -6.00   | <b>-9.98</b>   | -7.31   | <b>-10.31</b>  | -9.34   | <b>-11.65</b>  | -8.29   | -9 (1.9)     |
|                             | Internal variation     | Mol m <sup>-2</sup> | -0.19   | <b>0.80</b>    | -0.06   | <b>0.24</b>    | -0.03   | <b>0.72</b>    | -0.08   | 0.22 (0.4)   |
|                             | BGC                    | Mol m <sup>-2</sup> | -1.62   | <b>-2.24</b>   | -1.89   | <b>-2.23</b>   | -1.65   | <b>-2.33</b>   | -1.95   | -2 (0.3)     |

|                                     |                        |                     |       |              |       |              |       |              |       |             |
|-------------------------------------|------------------------|---------------------|-------|--------------|-------|--------------|-------|--------------|-------|-------------|
| Intermediate layer<br>(150 - 400 m) | Physical transfer      | Mol m <sup>-2</sup> | 1.45  | <b>3.04</b>  | 1.84  | <b>2.48</b>  | 1.62  | <b>3.05</b>  | 1.86  | 2.19 (0.66) |
|                                     | vertical flux at 400 m | Mol m <sup>-2</sup> | 0.58  | <b>-0.95</b> | 0.37  | <b>1.22</b>  | -0.58 | <b>-0.04</b> | 0.99  | 0.22 (0.79) |
|                                     | Vertical flux net      | Mol m <sup>-2</sup> | 4.47  | <b>5.24</b>  | 4.28  | <b>5.16</b>  | 2.33  | <b>4.94</b>  | 4.45  | 4.4 (0.99)  |
|                                     | Lat Ionian flux        | Mol m <sup>-2</sup> | -1.41 | <b>1.4</b>   | -1.01 | <b>2.46</b>  | 2.18  | <b>3.76</b>  | 0.2   | 1.1 ( 1.9)  |
|                                     | Lat Aegean flux        | Mol m <sup>-2</sup> | -1.61 | <b>-3.60</b> | -1.43 | <b>-5.14</b> | -2.89 | <b>-5.65</b> | -2.79 | -3.3 (1.6)  |

**Table S4: Annual air-sea oxygen flux, biogeochemical oxygen flux, vertical oxygen flux at 150 and 400 m, and lateral oxygen flux averaged over the 7 years, estimated from the model in the Rhodes Gyre. Positive values correspond to an input for the study area. The annual budget is calculated from December.**

|                    |                                      | Surface<br>(0-150m) | Intermediate<br>(150-400m) |                       | Surface<br>(0-150m) | Intermediate<br>(150-400m) |
|--------------------|--------------------------------------|---------------------|----------------------------|-----------------------|---------------------|----------------------------|
| Internal variation | Mol m <sup>-2</sup> yr <sup>-1</sup> | 0.01 (0.3)          | 0.26 (0.39)                | Gmol yr <sup>-1</sup> | 0.3 (8)             | 7 (10.8)                   |
| Air-sea flux       | Mol m <sup>-2</sup> yr <sup>-1</sup> | 3.92 (1.7)          | -                          | Gmol yr <sup>-1</sup> | 108 (49)            | -                          |
| BGC                | Mol m <sup>-2</sup> yr <sup>-1</sup> | 1.34 (0.56)         | -1.08 (0.33)               | Gmol yr <sup>-1</sup> | 37 (15)             | -30 (9)                    |
| Physical transfer  | Mol m <sup>-2</sup> yr <sup>-1</sup> | -5.25 (2)           | 1.35 (0.7)                 | Gmol yr <sup>-1</sup> | -144 (57)           | 37 (19)                    |
| Vertical flux      | Mol m <sup>-2</sup> yr <sup>-1</sup> | 4.15 (4.3)          | 6.98 (2.7)                 | Gmol yr <sup>-1</sup> | 114 (119)           | 192 (75)                   |
| Lateral flux       | Mol m <sup>-2</sup> yr <sup>-1</sup> | -9.4 (3.11)         | -5.63 (2.3)                | Gmol yr <sup>-1</sup> | -258 (85)           | -155 (63)                  |

## Figures

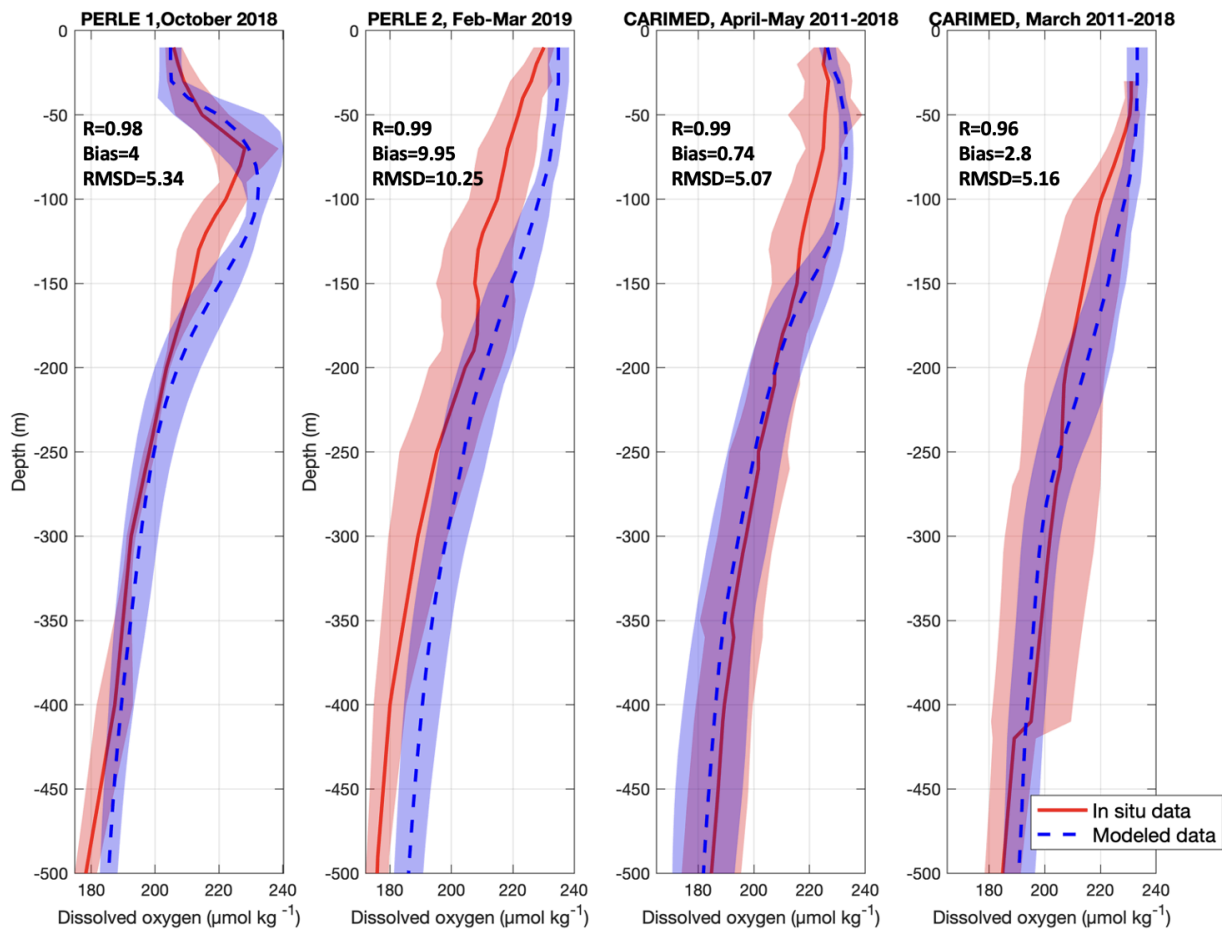

**Figure S1: Comparison between the mean modeled (blue dotted line) and observed (red solid line) profiles of the dissolved oxygen concentration ( $\mu\text{mol O}_2 \text{ kg}^{-1}$ ) during (a) PERLE-1, 6 profiles (10-20 October 2018), (b) PERLE-2, 16 profiles (25 February-16 March 2019), and ÇARIMED, 29 profiles (2011-2018) cruises occurring (c) during the stratification and (d) during mixing period. The shaded areas represent the standard deviation over the different profiles. Coefficient correlation (R), bias, and RMSD between model outputs and observations are indicated in the figures.**

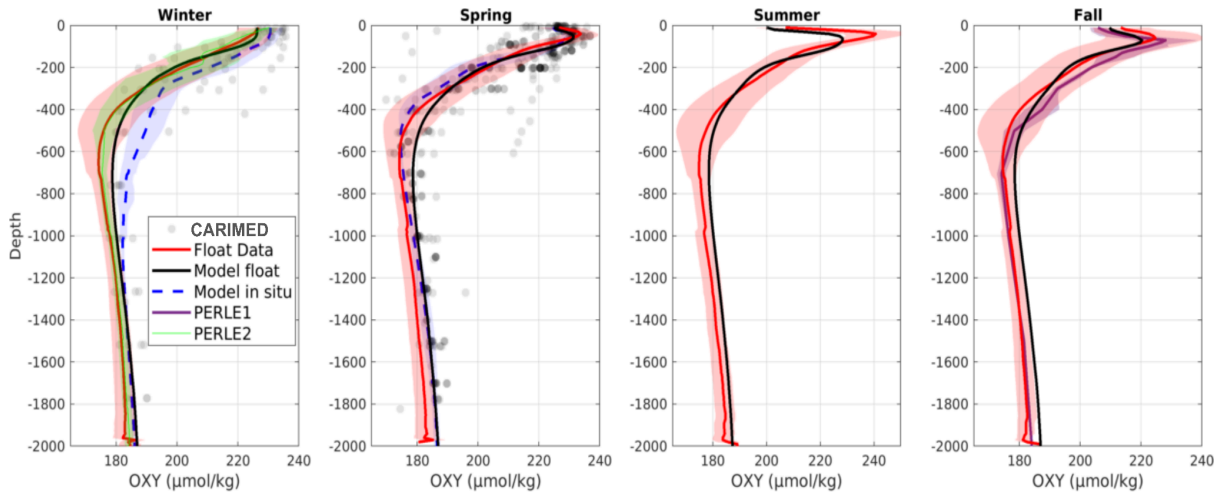

**Figure S2:** Comparison between observed (CARIMED, BGC-Argo float, PERLE-1, and PERLE-2 data, grey dots, red, purple, and green lines) and modeled (black and blue lines) profiles of oxygen ( $\mu\text{mol kg}^{-1}$ ) concentrations, averaged by season (winter: 21 December to 20 March, spring: 21 March to 20 June, summer: 21 June to 20 September, fall: 21 September to 20 December), over the Levantine Sea. Shaded areas correspond to SD.

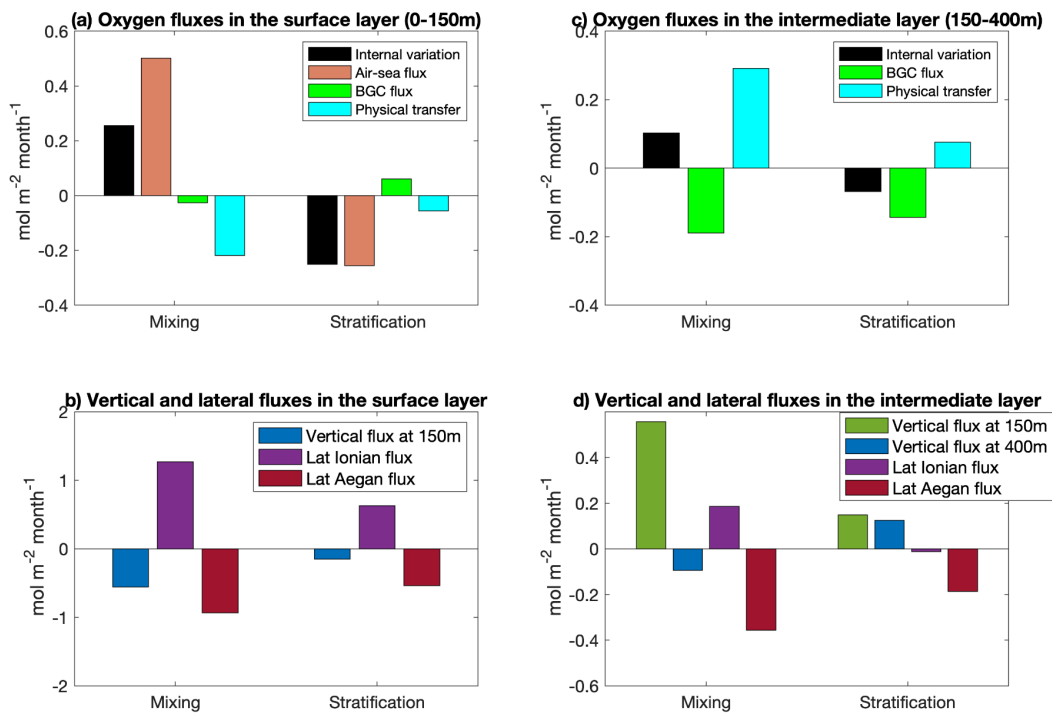

**Figure S3:** Modeled seasonal oxygen fluxes (a) in the surface and (c) intermediate layers and the downward and lateral fluxes (b) in the surface and (d) intermediate layers for the period of study, 2013-2020, and the Levantine Basin. Note that the y-axis range varies for the different figures.

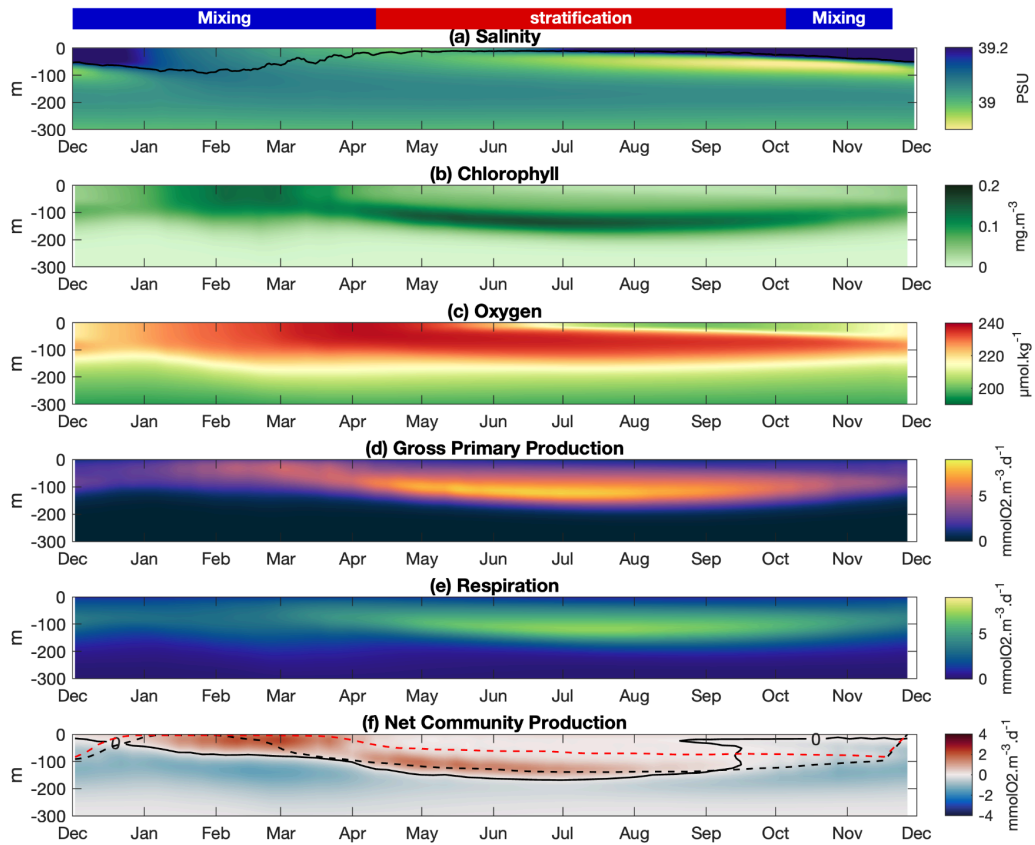

**Fig. S4:** Hovmöller diagrams of (a) salinity, (b) chlorophyll ( $\text{mg m}^{-3}$ ), (c) dissolved oxygen concentration ( $\mu\text{mol kg}^{-1}$ ), (d) gross primary production ( $\text{mmol m}^{-2} \text{day}^{-1}$ ), (e) community respiration ( $\text{mmol m}^{-2} \text{day}^{-1}$ ), and (f) net community production ( $\text{mmol m}^{-2} \text{day}^{-1}$ ), averaged over the Levantine Basin, from December 2013 to May 2021. The black line in (a) indicates the mixed layer depth.

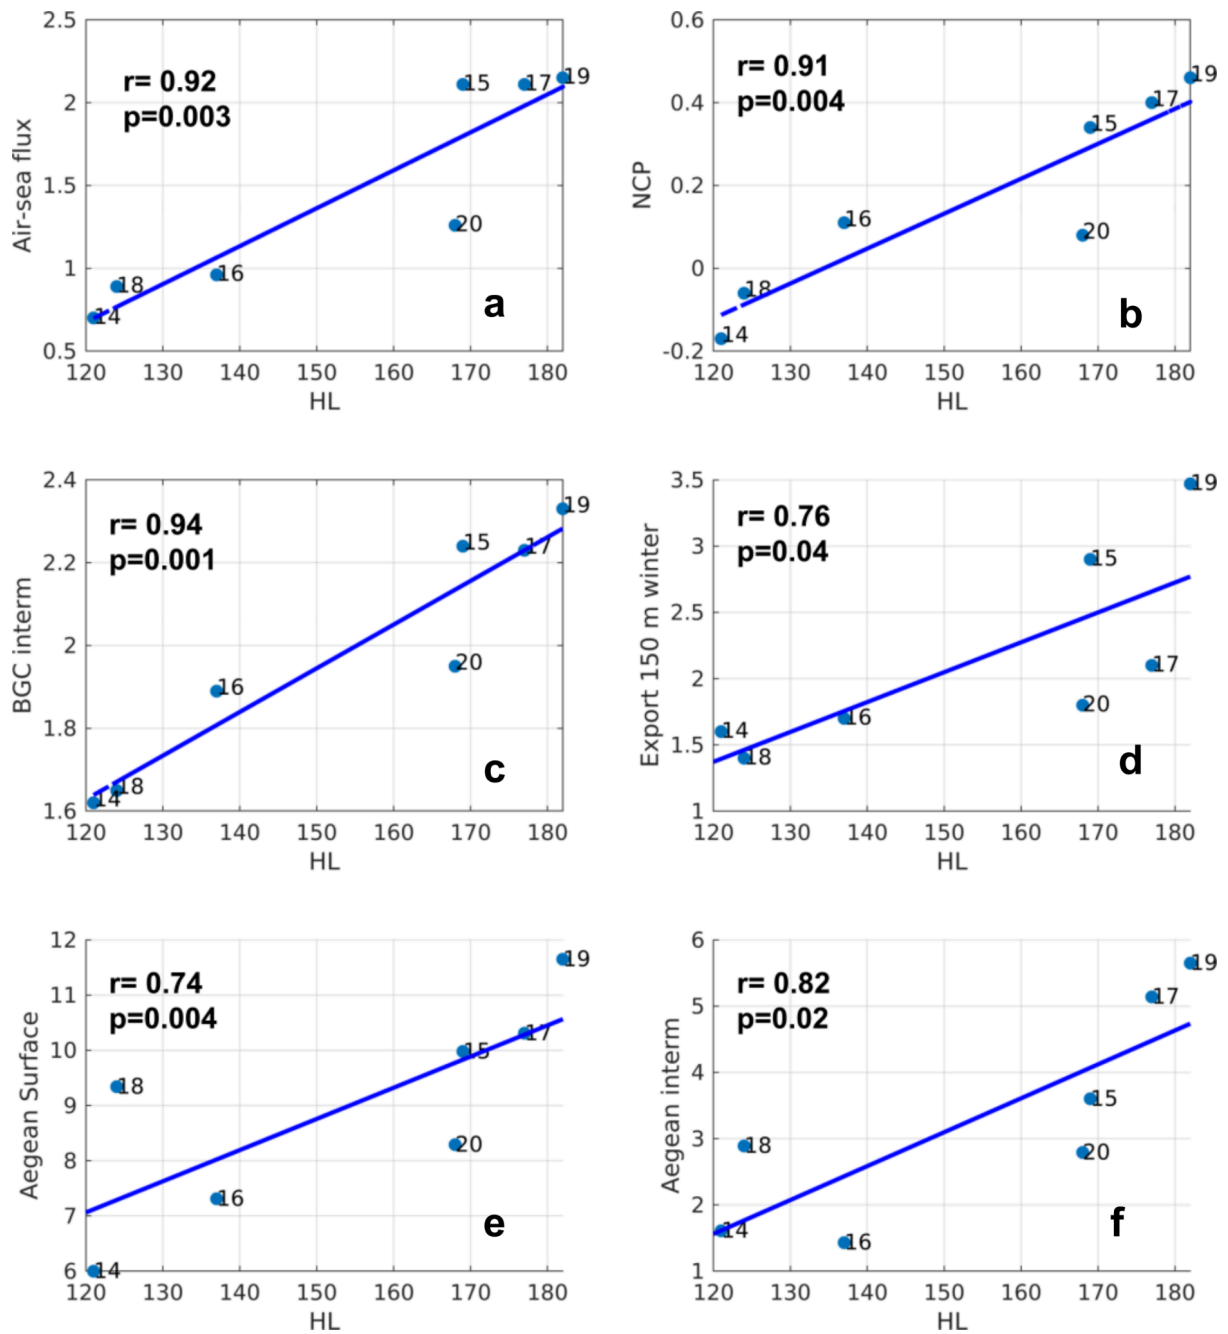

Figure S5: Scatter-plot of winter heat loss ( $\text{W m}^{-2}$ ) vs. mean annual values of (a) Air-sea oxygen flux ( $\text{mol m}^{-2}$ ) into surface layer (b) NCP ( $\text{mol m}^{-2}$ ), (c) biogeochemical consumption in the intermediate layer, (d) winter downward export of oxygen at 150 m, (e) lateral oxygen export towards the Aegean in the surface layer, and (f) in the intermediate layer. The years are identified by the numbers in black, e.g., 14 stands for 2013-14. The blue line shows the linear regression over the 7 years. The corresponding correlations and p-values are shown for each variable.

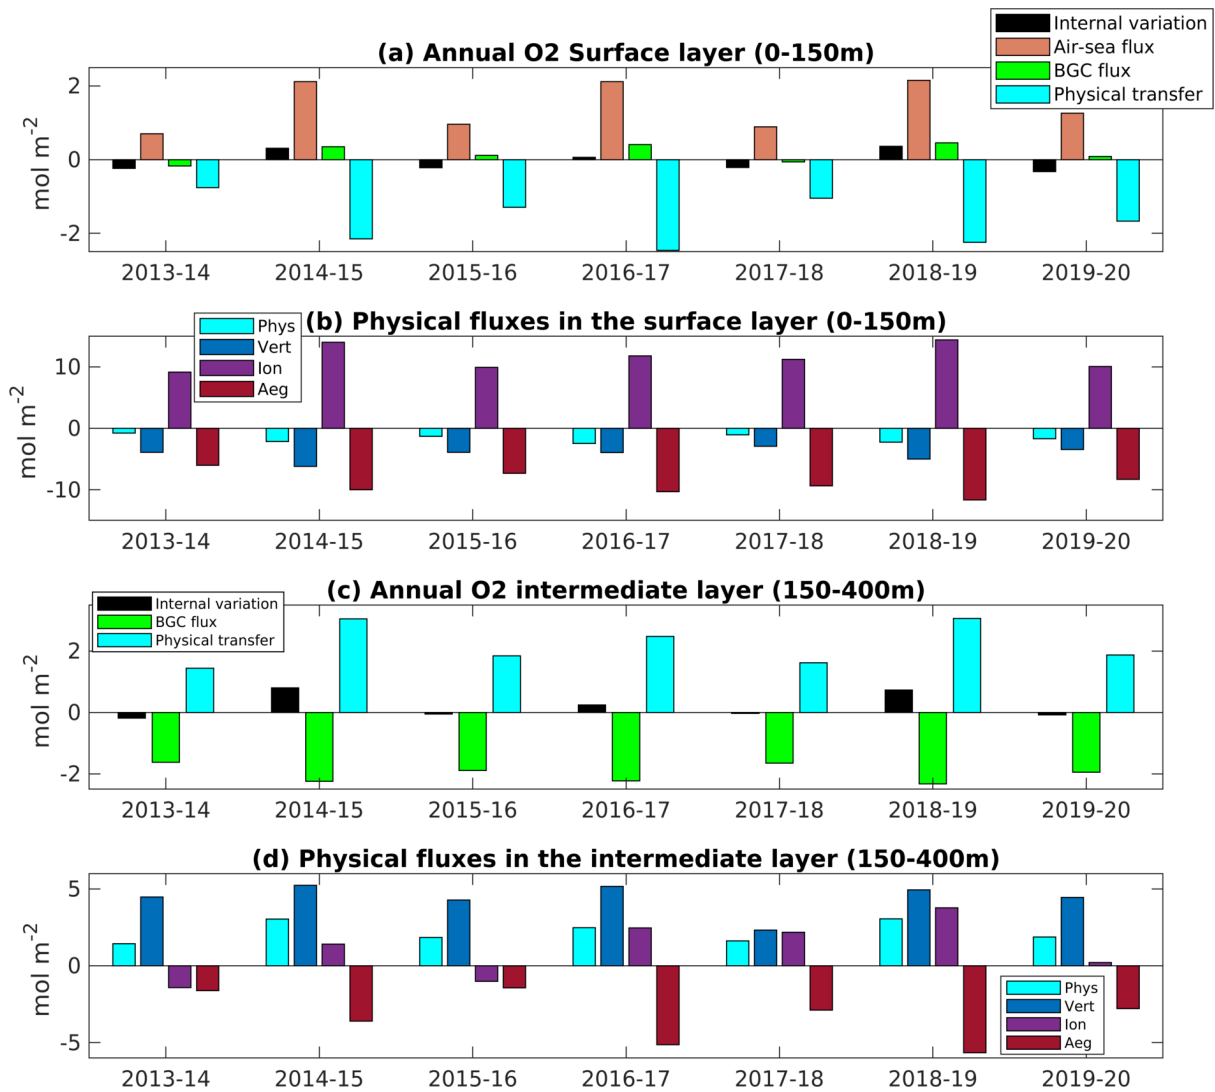

**Figure S6: (a) Modeled annual dissolved oxygen fluxes (b) and the detailed vertical and lateral transport at the limits of the 0-150 m layer. (c) Modeled annual dissolved oxygen fluxes (d) and the detailed vertical and lateral transport at the limits of the 150 -400 m layer.**

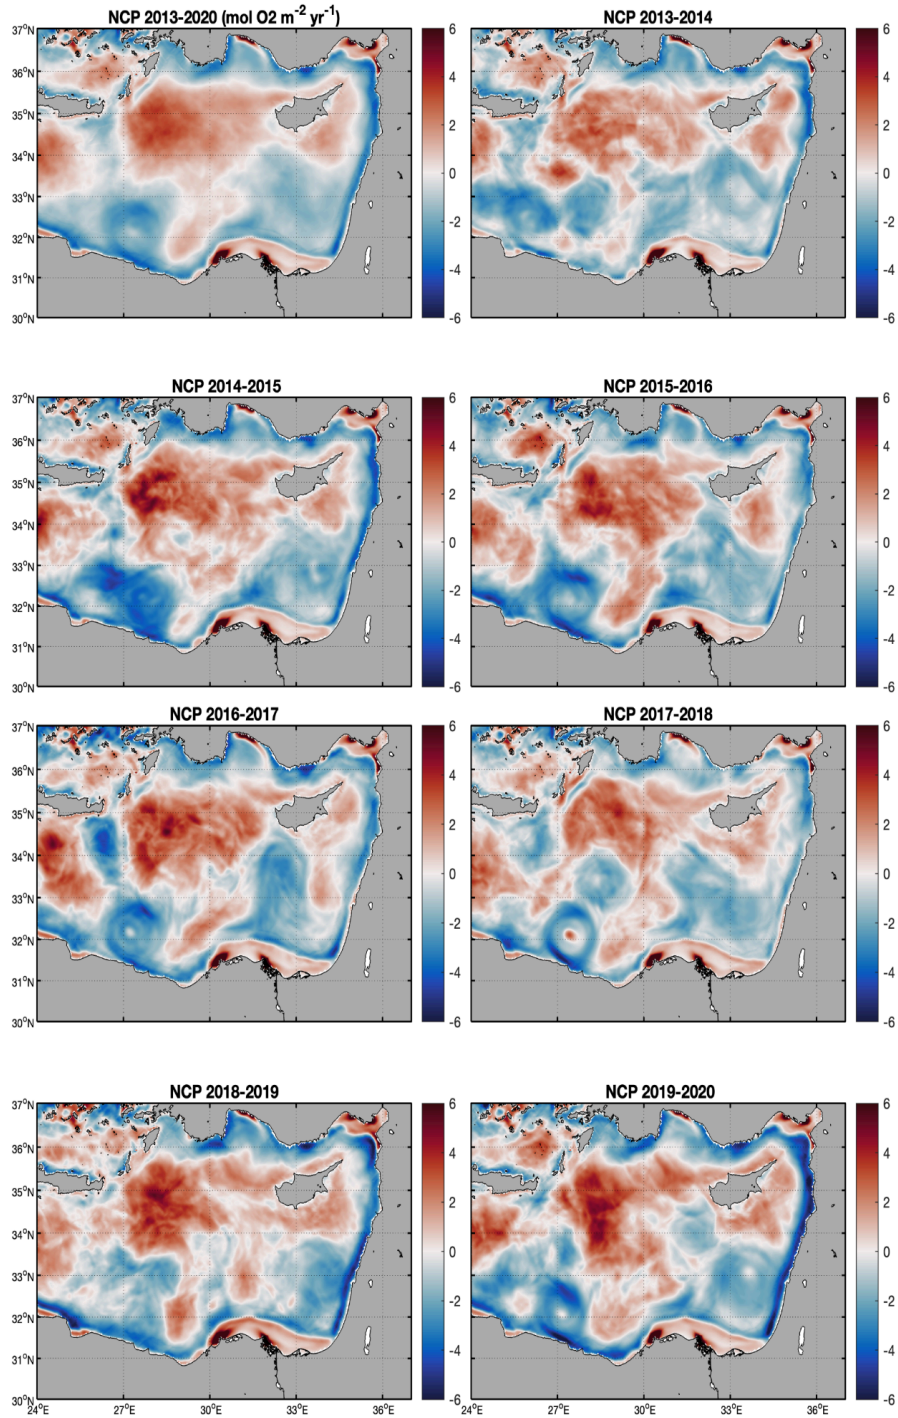

**Figure S7: Modeled annual net community production (NCP) in the surface layer (0-150 m) for the period from December 2013 to December 2020.**

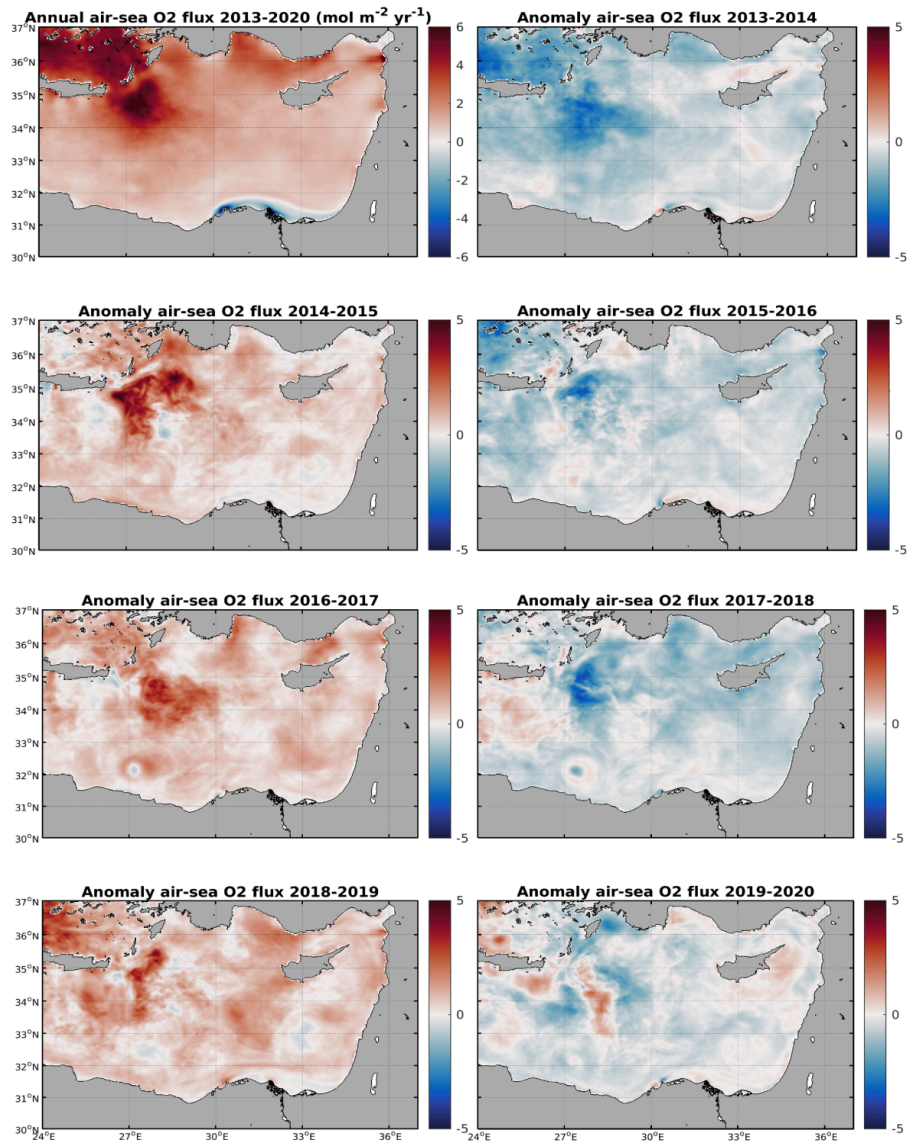

**Figure S8: Modeled annual air-sea oxygen flux in the surface layer (0-150 m) for the period from December 2013 to December 2020.**
